# Supplementary material for: Placebo effects in a RCT assessing 30 days of low dose Cannabidiol (CBD) treatment for psychological distress in stressed students at risk for depression
Source: J Cannabis Res. 2025 Nov 28;7:98. doi: 10.1186/s42238-025-00366-9 (PMC12664194; doi:10.1186/s42238-025-00366-9)
Supplement: Supplementary file 1 — Supplementary material 1 [file 42238_2025_366_MOESM1_ESM.xlsx]

## Sheet: Tabelle1
	Dosierplan von :		xxx	VP-Code			1. Termin		2024-12-17
	CBD pro Tropfen:		2.5	mg			2. Termin
	Gewicht:		60	kg
	Tag	Datum	Dosis	Anzahl				Zeit	Notizen/Anmerkungen
			in mg	Tropfen
	1	2024-12-17	1.2	1
	2	2024-12-18	1.2	1
	3	2024-12-19	1.2	1
	4	2024-12-20	3.6	2
	5	2024-12-21	3.6	2
	6	2024-12-22	3.6	2
	7	2024-12-23	6	3
	8	2024-12-24	6	3
	9	2024-12-25	6	3
	10	2024-12-26	9	4
	11	2024-12-27	9	4
	12	2024-12-28	9	4
	13	2024-12-29	12	5
	14	2024-12-30	12	5
	15	2024-12-31	12	5					Onlinefragebogen
	16	2025-01-01	18	8
	17	2025-01-02	18	8
	18	2025-01-03	18	8
	19	2025-01-04	24	10
	20	2025-01-05	24	10
	21	2025-01-06	24	10
	22	2025-01-07	36	15
	23	2025-01-08	36	15
	24	2025-01-09	36	15
	25	2025-01-10	48	20
	26	2025-01-11	48	20
	27	2025-01-12	48	20
	28	2025-01-13	60	24
	29	2025-01-14	60	24
	30	2025-01-15	60	24					Onlinefragebogen
